# Supplementary material for: Reduced emergent character of neural dynamics in patients with a disrupted connectome
Source: PubMed Central journal article supplement (PMC9989666; doi:10.1016/j.neuroimage.2023.119926), 2023-04-01
Supplement: mmc1.pdf [file mmc1.pdf]

# Reduced emergent character of neural dynamics in patients with a disrupted connectome

Andrea I. Luppi\*, Pedro A.M. Mediano, Fernando E. Rosas, Judith Allanson, John D. Pickard, Guy B. Williams, Michael M. Craig, Paola Finoia, Alexander R.D. Peattie, Peter Coppola, David K. Menon, Daniel Bor, Emmanuel A. Stamatakis

## Supplementary Information

### Supplementary Figures

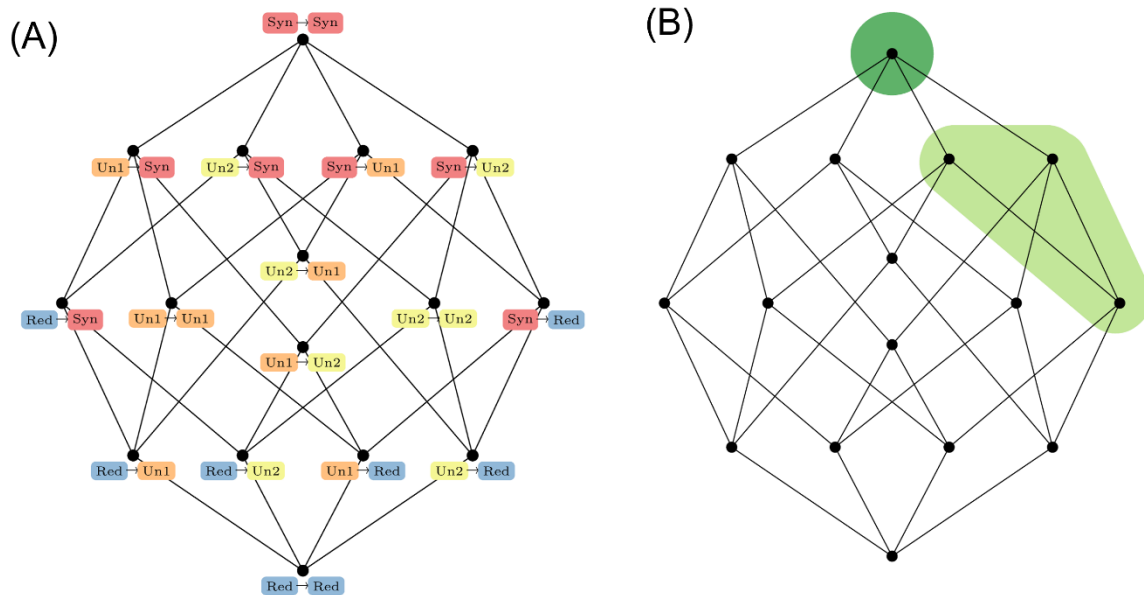

**Figure S1.** Schematic of  $\Phi$ ID's account of causal emergence. (A). 16 "information atoms" representing the possible combinations of synergistic (red), unique (orange and yellow), and redundant (blue) information across time. (B) Information atoms that constitute causal emergence: causal decoupling (dark green) and downward causation (light green).

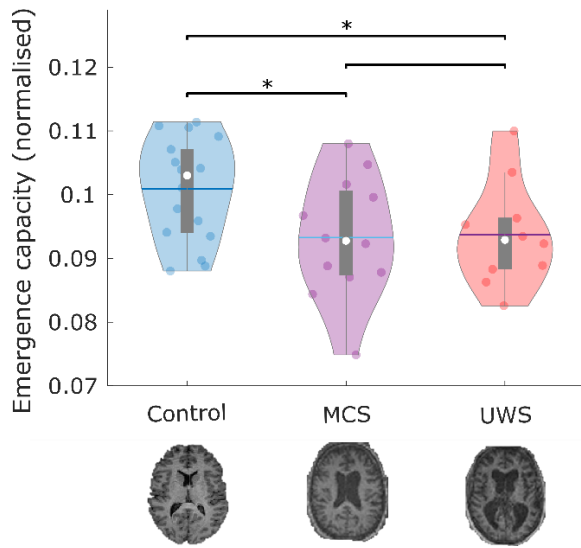

18

19 **Figure S2. Replication of emergence results after normalising by the total mutual information (TDMI).** Data  
 20 points represent subjects. White circle, median; center line, mean; box limits, upper and lower quartiles;  
 21 whiskers, 1.5x interquartile range. \* p < 0.05, FDR-corrected.

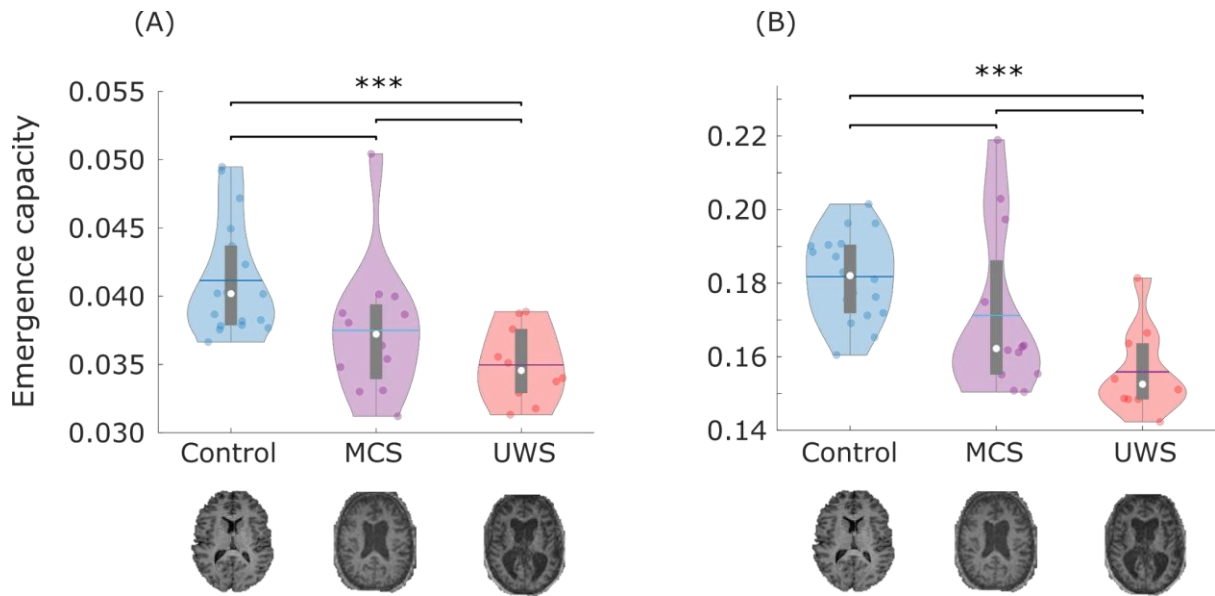

22

23 **Figure S3. Replication of emergence results with alternative implementations of information**  
 24 **decomposition.** (A) Significant differences in global emergence capacity are observed when performing integrated  
 25 information decomposition using continuous signals (using the JIDT Gaussian solver). (B) Significant differences  
 26 in global emergence capacity are observed when performing integrated information decomposition using the  
 27 minimum mutual information (MMI) definition of redundancy. Data points represent subjects. White circle, median;  
 28 center line, mean; box limits, upper and lower quartiles; whiskers, 1.5x interquartile range. \*\*  $p < 0.01$ ; \*\*\*  
 29  $p < 0.001$ , FDR-corrected.  
 30

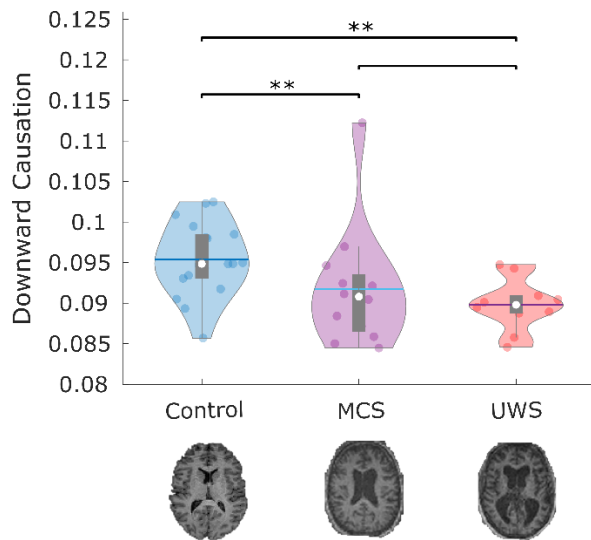

31

32 **Figure S4. Differences in downward causation.** Data points represent subjects. White circle, median; center  
 33 line, mean; box limits, upper and lower quartiles; whiskers, 1.5x interquartile range. \*\*  $p < 0.01$ , FDR-  
 34 corrected.  
 35

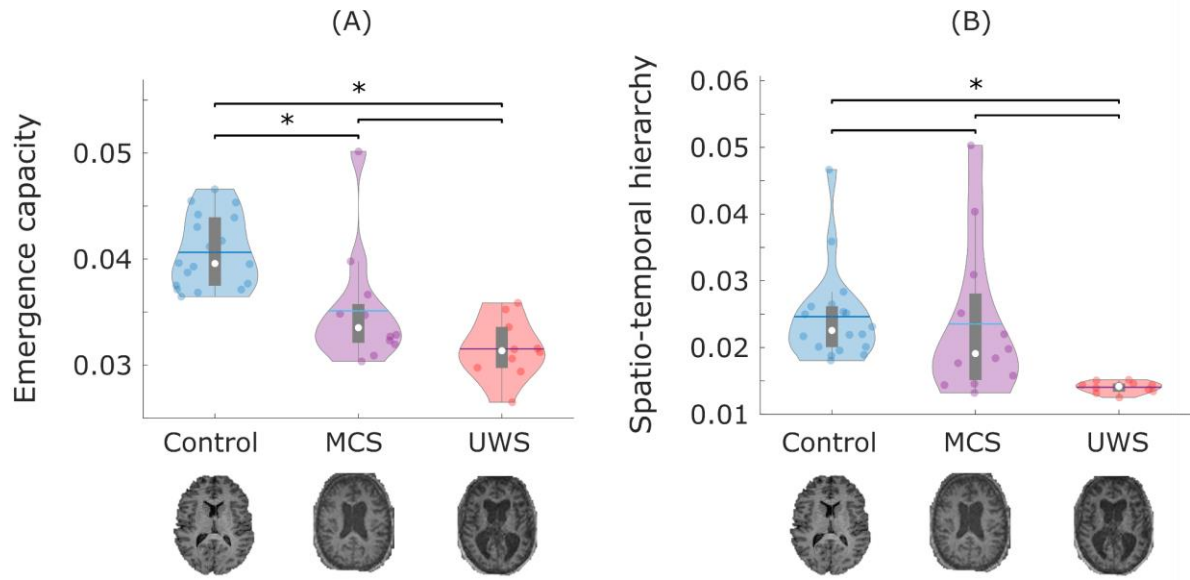

36

37 **Figure S5. Functional results after controlling for head motion.** (A) The global emergence capacity. (B) Spatio-  
 38 temporal hierarchy of intrinsic-driven ignition. Data points represent subjects. White circle, median; center line,  
 39 mean; box limits, upper and lower quartiles; whiskers, 1.5x interquartile range. \*\*  $p < 0.01$ ; \*\*\*  $p < 0.001$ ,  
 40 FDR-corrected.  
 41

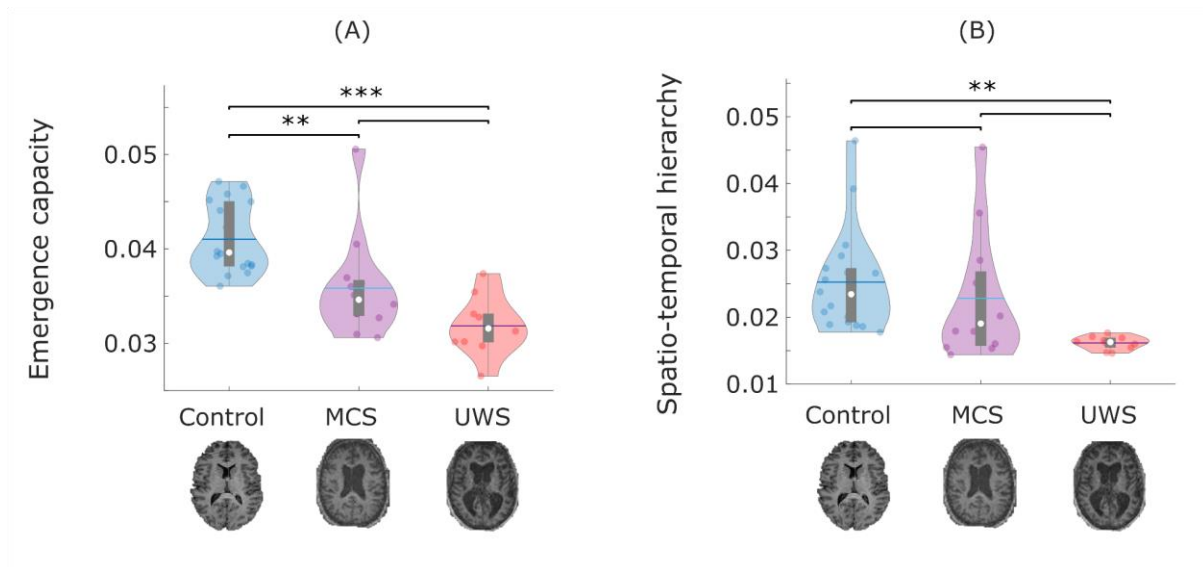

42

43 **Figure S6. Replication of empirical results with Lausanne-129 parcellation.** (A) Empirical global emergence  
 44 capacity. (B) Empirical spatio-temporal hierarchy of intrinsic ignition. Data points represent subjects. White circle,  
 45 median; center line, mean; box limits, upper and lower quartiles; whiskers, 1.5x interquartile range. \*\*  $p <$   
 46 0.01; \*\*\*  $p <$  0.001, FDR-corrected.  
 47

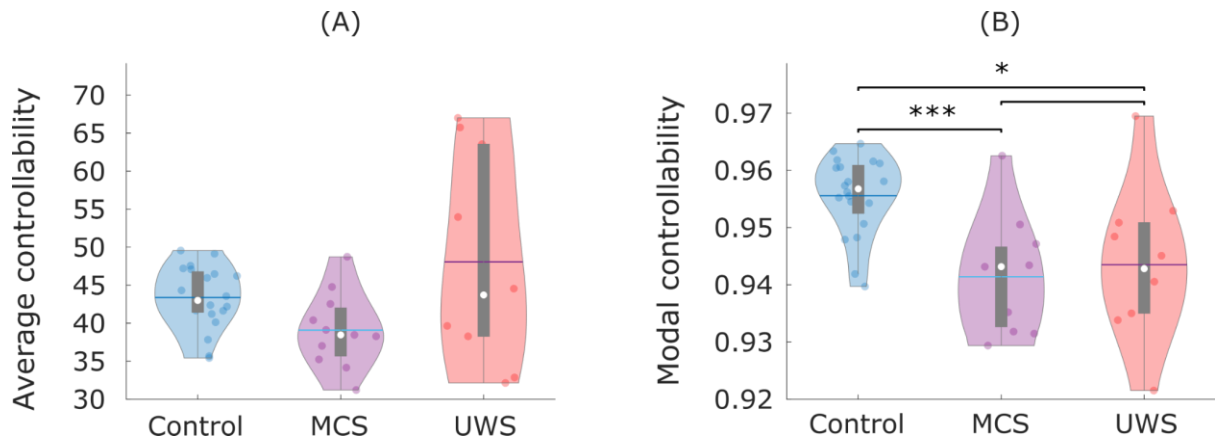

48

49 **Figure S7. Replication of structural controllability results with Lausanne-129 parcellation.** (A) No significant  
 50 effect of group membership (control, MCS, UWS) on global average controllability ( $F(2,36) = 1.30, p = 0.284$ ). (B)  
 51 Global modal controllability is significantly reduced in DOC patients. Data points represent subjects. White circle,  
 52 median; center line, mean; box limits, upper and lower quartiles; whiskers, 1.5x interquartile range. \*\*\*  $p <$   
 53 0.001, FDR-corrected.

54

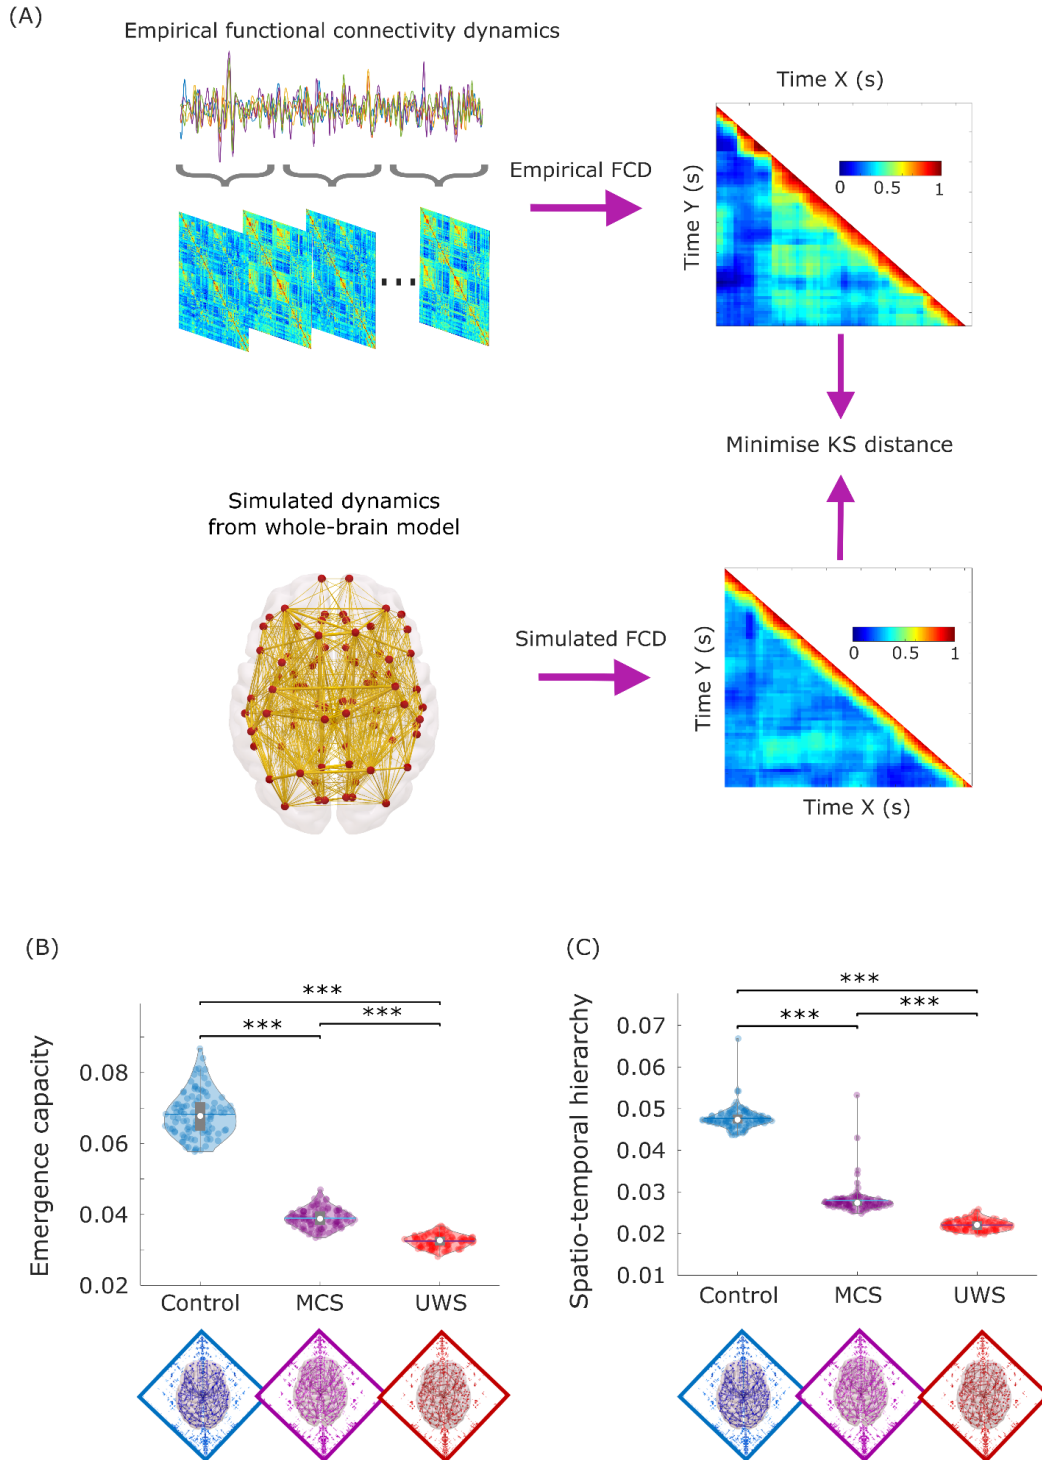

55

56 **Figure S8. Simulated results from alternative model fitting procedure.** (A) Overview of model-fitting based on  
 57 functional connectivity dynamics (FCD). Time-resolved matrices of functional connectivity are obtained from  
 58 empirical functional MRI via the sliding-window approach: regional BOLD time-series are partitioned into windows  
 59 of 30 TRs, sliding by 3 TRs at a time, following the same approach as previous work using the DMF model;  
 60 functional connectivity between each pair of regions is computed within each window by means of Pearson  
 61 correlation, generating a stack of FC matrices representing the evolution of FC over time. The same procedure is  
 62 repeated for the simulated BOLD timeseries produced by the model with various levels of the global coupling  
 63 parameter,  $G$ . For both the empirical and simulated functional connectivity dynamics (FCD), a time-versus-time  
 64 FCD matrix is computed by correlating the time-dependent FC matrices centred at each timepoint. Across values  
 65 of the global coupling parameter  $G$ , we compute the KS-distance between the empirical FCD and the FCD of each



66 simulation, to find the value of  $G$  that minimises the average KS-distance across 40 simulations. This procedure  
67 determines the value that allows the model to best simulate the empirical dynamics of functional connectivity in the  
68 brain, for each group. (B) Simulated global emergence capacity. (C) Simulated spatio-temporal hierarchy of  
69 intrinsic-driven ignition. Every point in this figure is a simulation run. White circle, median; center line, mean;  
70 box limits, upper and lower quartiles; whiskers, 1.5x interquartile range. \*\*  $p < 0.01$ ; \*\*\*  $p < 0.001$ , FDR-  
71 corrected.

72

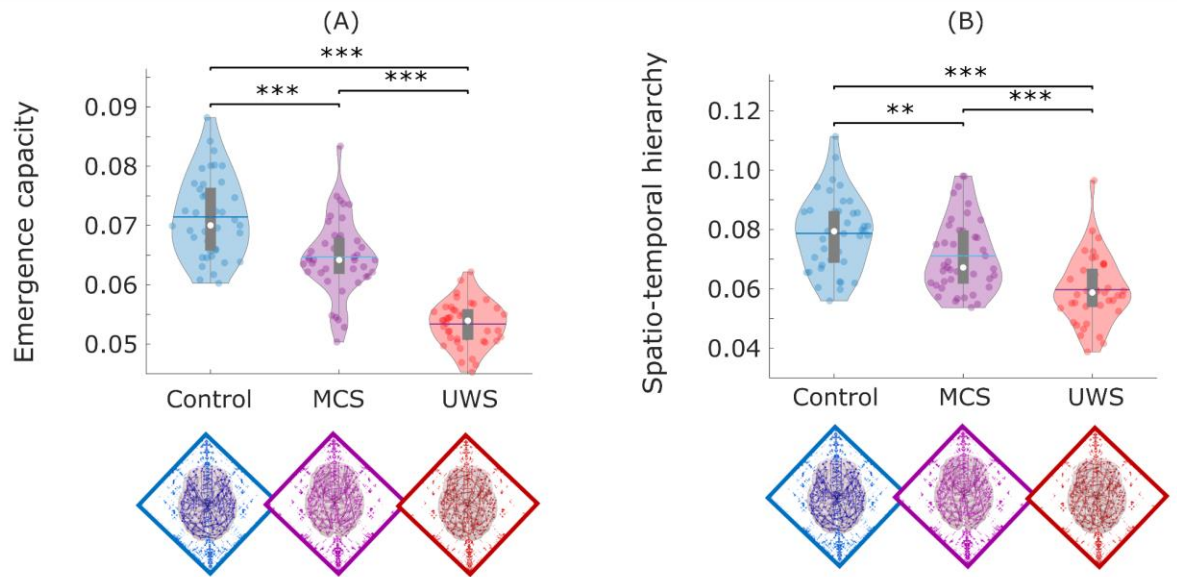

73

74 **Figure S9. Replication of whole-brain modelling results with Lausanne-129 parcellation.** (A) Simulated global  
 75 emergence capacity. (B) Simulated spatio-temporal hierarchy of intrinsic ignition. Every point in this figure is a  
 76 simulation run. White circle, median; center line, mean; box limits, upper and lower quartiles; whiskers,  
 77 1.5x interquartile range. \*\*  $p < 0.01$ ; \*\*\*  $p < 0.001$ , FDR-corrected.

78

79 **Supplementary Tables**

80 **Table S1.** Pairwise statistical comparisons for emergence capacity.

| Contrast    | Mean1 | Mean2 | SD1   | SD2   | tStat | df | EffSize | pVal  |
|-------------|-------|-------|-------|-------|-------|----|---------|-------|
| CTRL vs MCS | 0.040 | 0.035 | 0.003 | 0.015 | 3.45  | 28 | 1.25    | 0.002 |
| CTRL vs UWS | 0.040 | 0.031 | 0.003 | 0.003 | 7.24  | 26 | 2.77    | 0.000 |
| MCS vs UWS  | 0.035 | 0.031 | 0.05  | 0.003 | 1.90  | 20 | 0.78    | 0.072 |

81

82 **Table S2.** Pairwise statistical comparisons for ignition-driven spatiotemporal hierarchy.

| Contrast    | Mean1 | Mean2 | SD1   | SD2   | tStat | df | EffSize | pVal  |
|-------------|-------|-------|-------|-------|-------|----|---------|-------|
| CTRL vs MCS | 0.025 | 0.024 | 0.007 | 0.012 | 0.32  | 28 | 0.116   | 0.752 |
| CTRL vs UWS | 0.025 | 0.014 | 0.007 | 0.001 | 4.72  | 26 | 1.806   | 0.000 |
| MCS vs UWS  | 0.024 | 0.014 | 0.012 | 0.001 | 2.59  | 20 | 1.066   | 0.018 |

83

84

85 **Table S3.** Pairwise statistical comparisons for whole-brain modal controllability, controlling for  
86 DWI acquisition scheme and number of motion-corrupted scans.

| Contrast       | Estimate | SE    | tStat  | EffSize | pVal  |
|----------------|----------|-------|--------|---------|-------|
| CTRL vs<br>MCS | -0.013   | 0.003 | -5.116 | -0.919  | 0.000 |
| CTRL vs<br>UWS | -0.012   | 0.003 | -4.057 | -0.741  | 0.000 |
| MCS vs<br>UWS  | 0.001    | 0.004 | 0.220  | 0.048   | 0.828 |

87
